# Supplementary material
Source: PubMed Central journal article supplement (PMC4134911)
Supplement: NIHMS614466-supplement-01.pdf [file NIHMS614466-supplement-01.pdf]

## Figure Legend

(Top) A transcriptionally silent, compacted mitotic chromosome (left) with bookmarking transcription factors bound (green shades) and other factors not bound (red and purple). During mitotic exit, the bookmarking factors facilitate the rapid activation of the genes to which they are bound in mitosis.

(Bottom) A transcriptionally silent, compacted gene with pioneer transcription factors bound in early development. During cell type specification, pioneer factors facilitate the binding of other factors (red, purple) and the activation of genes to which they are bound. The text discusses the recently discovered similarities between bookmarking and pioneer transcription factors.

### Table S1

**A. Features of Mitotic Chromatin.** The list below describes general features of chromatin structure and dynamics that have been studied in mitosis.

| <u>Chromatin feature</u>          | <u>Mitotic behavior</u>              | <u>Caveats/notes</u>                                | <u>References</u>   |
|-----------------------------------|--------------------------------------|-----------------------------------------------------|---------------------|
| Higher order chromosome structure | Essentially lost                     |                                                     | Naumova et al. 2013 |
| Histone acetyltransferases        | Virtually lost from chromatin        | Partial histone retention at loci<br>Kouskouti 2005 | Kruhlak et al. 2001 |
| H3K9me3                           | Retained                             |                                                     | McManus et al.      |
| H3K27me3                          | Retained                             |                                                     | Follmer et al. 2012 |
| Histone exchange                  | Lower than in interphase             |                                                     | Chen et al. 2005    |
| Nucleosome positioning            | Lost/altered                         |                                                     | Komura & Ono 2005   |
| H2.AZ positioning                 | Shifted to cover transcription start |                                                     | Kelley et al. 2010  |

**B. Features of mitotic bookmarking factors.** The following transcription factors are among the subset that is retained on chromosomes during mitosis. Knock-down of the following has been shown to result in delayed post-mitotic reactivation of genes to which they remain bound in mitosis.

| Bookmarking factor | Relevant cell tested | Interphase binding sites occupied in mitosis | Binds target sites on nucleosomes | Reference                                    |
|--------------------|----------------------|----------------------------------------------|-----------------------------------|----------------------------------------------|
| BRD4               | Hematopoietic        | n.d.                                         | n.d.                              | Zhao et al., 2011                            |
| FoxA1              | Liver                | 15%                                          | yes                               | Cirillo et al. 1998<br>Caravaca et al., 2013 |
| GATA1              | Hematopoietic        | 5.3%                                         | yes                               | Boyes et al. 1998<br>Kadauke et al., 2012    |
| MLL                | Hematopoietic        | 37%                                          | n.d.                              | Blobel et al., 2009                          |
| Runx2              | Osteogenic           | n.d.                                         | n.d.                              | Young et al., 2007                           |

**Table S1 References:**

Blobel, G.A., Kadauke, S., Wang, E., Lau, A.W., Zuber, J., Chou, M.M., and Vakoc, C.R. (2009). A reconfigured pattern of MLL occupancy within mitotic chromatin promotes rapid transcriptional reactivation following mitotic exit. *Mol Cell* 36, 970-983.

Boyes, J., Omichinski, J., Clark, D., Pikaart, M., and Felsenfeld, G. (1998). Perturbation of nucleosome structure by the erythroid transcription factor GATA-1. *J Mol Biol* 279, 529-544.

Caravaca, J.M., Donahue, G., Becker, J.S., He, X., Vinson, C., and Zaret, K.S. (2013). Bookmarking by specific and nonspecific binding of FoxA1 pioneer factor to mitotic chromosomes. *Genes Dev* 27, 251-260.

Chen, D., Dundr, M., Wang, C., Leung, A., Lamond, A., Misteli, T., and Huang, S. (2005). Condensed mitotic chromatin is accessible to transcription factors and chromatin structural proteins. *J Cell Biol* 168, 41-54.

Cirillo, L.A., McPherson, C.E., Bossard, P., Stevens, K., Cherian, S., Shim, E.-Y., Clark, E.A., Burley, S.K., and Zaret, K.S. (1998). Binding of the winged-helix transcription factor HNF3 to a linker histone site on the nucleosome. *EMBO J* 17, 244-254.

Follmer, N.E., Wani, A.H., and Francis, N.J. (2012). A polycomb group protein is retained at specific sites on chromatin in mitosis. *PLoS Genet* 8, e1003135.

- Kadauke, S., Udugama, M.I., Pawlicki, J.M., Achtman, J.C., Jain, D.P., Cheng, Y., Hardison, R.C., and Blobel, G.A. (2012). Tissue-Specific Mitotic Bookmarking by Hematopoietic Transcription Factor GATA1. *Cell* 150, 725-737.
- Kelly, T.K., Miranda, T.B., Liang, G., Berman, B.P., Lin, J.C., Tanay, A., and Jones, P.A. (2010). H2A.Z maintenance during mitosis reveals nucleosome shifting on mitotically silenced genes. *Mol Cell* 39, 901-911.
- Komura, J., and Ono, T. (2005). Disappearance of nucleosome positioning in mitotic chromatin in vivo. *J Biol Chem* 280, 14530-14535.
- Kruhlak, M.J., Hendzel, M.J., Fischle, W., Bertos, N.R., Hameed, S., Yang, X.J., Verdin, E., and Bazett-Jones, D.P. (2001). Regulation of global acetylation in mitosis through loss of histone acetyltransferases and deacetylases from chromatin. *J Biol Chem* 276, 38307-19.
- McManus, K.J., Biron, V.L., Heit, R., Underhill, D.A., and Hendzel, M.J. (2006). Dynamic changes in histone H3 lysine 9 methylations: identification of a mitosis-specific function for dynamic methylation in chromosome congression and segregation. *J Biol Chem* 281, 8888-8897.
- Naumova, N., Imakaev, M., Fudenberg, G., Zhan, Y., Lajoie, B.R., Mirny, L.A., and Dekker, J. (2013). Organization of the mitotic chromosome. *Science* 342, 948-953.
- Young, D.W., Hassan, M.Q., Yang, X.Q., Galindo, M., Javed, A., Zaidi, S.K., Furcinitti, P., Lapointe, D., Montecino, M., Lian, J.B., *et al.* (2007). Mitotic retention of gene expression patterns by the cell fate-determining transcription factor Runx2. *Proc Natl Acad Sci U S A* 104, 3189-3194.
- Zhao, R., Nakamura, T., Fu, Y., Lazar, Z., and Spector, D.L. (2011). Gene bookmarking accelerates the kinetics of post-mitotic transcriptional re-activation. *Nat Cell Biol* 13, 1295-1304.
